# Supplementary material for: Evaluating Prognosis of Gastrointestinal Metastatic Neuroendocrine Tumors: Constructing a Novel Prognostic Nomogram Based on NETPET Score and Metabolic Parameters from PET/CT Imaging
Source: MDPI journal article supplement (doi:10.3390/ph17030373), 2024-03-14
Supplement: s1 [file s1]

| 1 year OS |                           | 2 year OS |                           | 3 year OS |                           | 6-month PFS |                           | 12-month PFS |                           | 18-month PFS |                           |           |
|-----------|---------------------------|-----------|---------------------------|-----------|---------------------------|-------------|---------------------------|--------------|---------------------------|--------------|---------------------------|-----------|
|           | Estimate (95% CI)         | P value   | Estimate (95% CI)         | P value   | Estimate (95% CI)         | P value     | Estimate (95% CI)         | P value      | Estimate (95% CI)         | P value      | Estimate (95% CI)         | P value   |
| AUC       |                           |           |                           |           |                           |             |                           |              |                           |              |                           |           |
| D grade   | 0.812 ( 0.736-0.889 )     | Reference | 0.786 ( 0.717-0.855)      | Reference | 0.802 ( 0.718-0.889 )     | Reference   | 0.830 ( 0.758 - 0.902 )   | Reference    | 0.810 ( 0.754 - 0.865 )   | Reference    | 0.802 ( 0.748 - 0.856 )   | Reference |
| F grade   | 0.700 ( 0.576-0.824 )     | 0.061     | 0.797 ( 0.725-0.868)      | 0.743     | 0.792 ( 0.706-0.877)      | 0.810       | 0.697 ( 0.613 - 0.781 )   | 0.001        | 0.690 ( 0.623 - 0.757 )   | <0.001       | 0.690 (0.625 - 0.756 )    | 0.001     |
| S grade   | 0.609 ( 0.476-0.742)      | 0.002     | 0.552 ( 0.462-0.642)      | <0.001    | 0.502 ( 0.400-0.605 )     | <0.001      | 0.657 ( 0.557 - 0.757 )   | 0.002        | 0.589 ( 0.522 - 0.656 )   | <0.001       | 0.532 ( 0.464 - 0.600 )   | <0.001    |
| WHO grade | 0.726 ( 0.623-0.829)      | 0.100     | 0.653 ( 0.580-0.727)      | 0.003     | 0.647 ( 0.600-0.739 )     | 0.005       | 0.665 ( 0.573 - 0.756 )   | 0.003        | 0.613 ( 0.553 - 0.674 )   | <0.001       | 0.632 ( 0.572 - 0.692 )   | <0.001    |
| NRI       |                           |           |                           |           |                           |             |                           |              |                           |              |                           |           |
| D grade   | Reference                 |           | Reference                 |           | Reference                 |             | Reference                 |              | Reference                 |              | Reference                 |           |
| F grade   | 0.017 ( -0.127 - 0.160 )  | 0.820     | -0.120 ( -0.295 - 0.055 ) | 0.178     | -0.042 ( -0.164 - 0.080 ) | 0.500       | -0.311 ( -0.537 - 0.085 ) | 0.007        | -0.311 ( -0.537 - 0.085 ) | 0.007        | -0.316 ( -0.493 - 0.140 ) | <0.001    |
| S grade   | -0.345 ( -0.471 - 0.218 ) | <0.001    | -0.639 ( -0.819 - 0.459 ) | <0.001    | -0.306 ( -0.450 - 0.162 ) | <0.001      | -0.464 ( -0.651 - 0.276 ) | <0.001       | -0.368 ( -0.505 - 0.232 ) | <0.001       | -0.700 ( -0.926 - 0.470 ) | <0.001    |
| WHO grade | -0.135 ( -0.265 - 0.005 ) | 0.041     | -0.525 ( -0.711 - 0.340 ) | <0.001    | -0.194 ( -0.335 - 0.053 ) | 0.007       | -0.135 ( -0.265 - 0.005 ) | 0.041        | -0.135 ( -0.265 - 0.005 ) | 0.041        | -0.497 ( -0.715 - 0.280 ) | <0.001    |
| IDI       |                           |           |                           |           |                           |             |                           |              |                           |              |                           |           |
| D grade   | Reference                 |           | Reference                 |           | Reference                 |             | Reference                 |              | Reference                 |              | Reference                 |           |
| F grade   | -0.033 ( -0.054 - 0.013 ) | 0.001     | -0.072 ( -0.118 - 0.027 ) | 0.002     | -0.086 ( -0.145 - 0.026 ) | 0.005       | -0.106 ( -0.150 - 0.061 ) | <0.001       | -0.146 ( -0.207 - 0.085 ) | <0.001       | -0.101 ( -0.148 - 0.053 ) | <0.001    |
| S grade   | -0.071 ( -0.092 - 0.045 ) | <0.001    | -0.166 ( -0.215 - 0.118 ) | <0.001    | -0.223 ( -0.287 - 0.160 ) | <0.001      | -0.146 ( -0.192 - 0.010 ) | <0.001       | -0.225 ( -0.290 - 0.160 ) | <0.001       | -0.189 ( -0.242 - 0.136 ) | <0.001    |
| WHO grade | -0.020 ( -0.049 - 0.009 ) | 0.172     | -0.070 ( -0.130 - 0.011 ) | 0.020     | -0.115 ( -0.188 - 0.041 ) | 0.002       | -0.084 ( -0.134 - 0.034 ) | 0.001        | -0.142 ( -0.213 - 0.071 ) | <0.001       | -0.124 ( -0.182 - 0.066 ) | <0.001    |

D: dual 18F-FDG and 68Ga-DOTANOC PET-CT semiquantitative grade; F: single 18F-FDG PET-CT semiquantitative grade; S: single 68Ga-DOTANOC PET-CT semiquantitative grade;

Supplementray Table S2. NRI, IDI, and C-index of the Grading Systems for OS and PFS in Traing Cohort

|                  | 1 year OS                 |           | 2 year OS                 |           | 3 year OS                  |           | 6-month PFS               |           | 12-month PFS              |           | 18-month PFS              |           |
|------------------|---------------------------|-----------|---------------------------|-----------|----------------------------|-----------|---------------------------|-----------|---------------------------|-----------|---------------------------|-----------|
|                  | Estimate (95% CI)         | P value   | Estimate (95% CI)         | P value   | Estimate (95% CI)          | P value   | Estimate (95% CI)         | P value   | Estimate (95% CI)         | P value   | Estimate (95% CI)         | P value   |
| <b>AUC</b>       |                           |           |                           |           |                            |           |                           |           |                           |           |                           |           |
| <b>Nomogram</b>  | 0.873 (0.797-0.949)       | Reference | 0.823 (0.733-0.913)       | Reference | 0.892 (0.806-0.950)        | Reference | 0.853 (0.755-0.952)       | Reference | 0.803 (0.729-0.877)       | Reference | 0.840 (0.772-0.908)       | Reference |
| <b>D grade</b>   | 0.810 (0.721-0.898)       | 0.034     | 0.770 (0.677-0.862)       | 0.032     | 0.837 (0.747-0.927)        | 0.018     | 0.810 (0.705-0.916)       | 0.062     | 0.760 (0.684-0.836)       | 0.044     | 0.777 (0.705-0.848)       | 0.012     |
| <b>F grade</b>   | 0.711 (0.575-0.846)       | <0.001    | 0.770 (0.673-0.867)       | 0.121     | 0.800 (0.700-0.903)        | 0.077     | 0.651 (0.537-0.764)       | <0.001    | 0.658 (0.573-0.734)       | <0.001    | 0.671 (0.586-0.756)       | <0.001    |
| <b>WHO grade</b> | 0.731 (0.613-0.849)       | <0.001    | 0.653 (0.567-0.739)       | <0.001    | 0.681 (0.575-0.787)        | <0.001    | 0.700 (0.594-0.807)       | 0.009     | 0.656 (0.588-0.724)       | <0.001    | 0.653 (0.583-0.723)       | <0.001    |
| <b>NRI</b>       |                           |           |                           |           |                            |           |                           |           |                           |           |                           |           |
| <b>Nomogram</b>  | Reference                 |           | Reference                 |           | Reference                  |           | Reference                 |           | Reference                 |           | Reference                 |           |
| <b>D grade</b>   | -0.225 (-0.388 - -0.062)  | 0.007     | -0.074 (-0.203 - 0.055)   | 0.263     | -0.326 (-0.532 - -0.121)   | 0.002     | -0.102 ( -0.193 - -0.010) | 0.030     | -0.169 ( -0.371 - 0.034)  | 0.102     | -0.114 ( -0.352 - 0.124)  | 0.347     |
| <b>F grade</b>   | -0.289 ( -0.443 - -0.134) | <0.001    | -0.605 ( -0.812 - -0.398) | <0.001    | -0.370 ( -0.521 - -0.219 ) | <0.001    | -0.280 ( -0.514 - -0.045) | <0.001    | -0.488 ( -0.740 - -0.235) | <0.001    | -0.608 ( -0.799 - -0.417) | <0.001    |



Supplementray Table S3. NRI, IDI, and C-index of the Grading Systems for OS and PFS in Internal Validation Cohort

| 1 year OS |                          |           | 2 year OS                 |           | 3 year OS                |           | 6-month PFS              |           | 12-month PFS              |           | 18-month PFS              |           |
|-----------|--------------------------|-----------|---------------------------|-----------|--------------------------|-----------|--------------------------|-----------|---------------------------|-----------|---------------------------|-----------|
|           | Estimate (95% CI)        | P value   | Estimate (95% CI)         | P value   | Estimate (95% CI)        | P value   | Estimate (95% CI)        | P value   | Estimate (95% CI)         | P value   | Estimate (95% CI)         | P value   |
| AUC       |                          |           |                           |           |                          |           |                          |           |                           |           |                           |           |
| Nomogram  | 0.889 (0.793-0.986)      | Reference | 0.892 (0.808-0.975)       | Reference | 0.821 (0.673-0.969)      | Reference | 0.899 (0.820-0.978)      | Reference | 0.919 (0.858-0.980)       | Reference | 0.914 (0.815-0.977)       | Reference |
| D grade   | 0.826 (0.675-0.977)      | 0.753     | 0.815 (0.712-0.918)       | 0.188     | 0.745 (0.584-0.906)      | 0.109     | 0.860 (0.779-0.942)      | 0.124     | 0.899 (0.829-0.968)       | 0.469     | 0.852 (0.776-0.929)       | 0.040     |
| F grade   | 0.640 (0.336-0.944)      | 0.050     | 0.832 (0.726-0.937)       | 0.692     | 0.779 (0.630-0.927)      | 0.868     | 0.759 (0.642-0.875)      | 0.004     | 0.732 (0.621-0.842)       | <0.001    | 0.717 (0.617-0.818)       | <0.001    |
| WHO grade | 0.703 (0.487-0.919)      | 0.236     | 0.654 (0.518-0.790)       | 0.003     | 0.588 (0.427-0.794)      | 0.028     | 0.606 (0.443-0.769)      | <0.001    | 0.528 (0.413-0.643)       | <0.001    | 0.593 (0.482-0.704)       | <0.001    |
| NRI       |                          |           |                           |           |                          |           |                          |           |                           |           |                           |           |
| Nomogram  | Reference                |           | Reference                 |           | Reference                |           |                          |           |                           |           |                           |           |
| D grade   | -0.164 ( -0.382 - 0.054) | 0.141     | -0.217 ( -0.496 - 0.061)  | 0.126     | -0.321 ( -0.550 - 0.092) | 0.006     | 0 ( -0.110 - 0.110)      | 1.000     | -0.541 ( -0.885 - 0.197)  | 0.002     | -0.075 ( -0.579 - 0.430)  | 0.772     |
| F grade   | -0.008 ( -0.256 - 0.239) | 0.947     | -0.014 ( -0.287 - 0.259)  | 0.919     | -0.312 ( -0.545 - 0.078) | 0.009     | -0.285 ( -0.652 - 0.081) | 0.127     | -0.950 ( -1.259 - 0.640 ) | <0.001    | -0.675 ( -1.014 - 0.337)  | <0.001    |
| WHO grade | -0.285 ( -0.484 - 0.086) | 0.005     | -0.804 ( -1.121 - 0.488)  | <0.001    | -0.589 ( -0.870 - 0.307) | <0.001    | -0.224 ( -0.340 - 0.108) | <0.001    | -0.715 ( -1.104 - 0.325)  | <0.001    | -0.784 ( -1.312 - 0.255)  | 0.004     |
| IDI       |                          |           |                           |           |                          |           |                          |           |                           |           |                           |           |
| Nomogram  | Reference                |           | Reference                 |           | Reference                |           |                          |           |                           |           |                           |           |
| D grade   | -0.063 ( -0.119 - 0.006) | 0.029     | -0.151 ( -0.258 - 0.045)  | 0.005     | -0.141 ( -0.245 - 0.036) | 0.009     | -0.041 ( -0.083 - 0.001) | 0.057     | -0.085 ( -0.185 - 0.015)  | 0.097     | -0.090 ( -0.2493 - 0.069) | <0.001    |
| F grade   | -0.066 ( -0.123 - 0.008) | 0.025     | -0.160 ( -0.266 - 0.054)  | 0.003     | -0.152 ( -0.256 - 0.047) | 0.004     | -0.167 ( -0.249 - 0.085) | <0.001    | -0.324 ( -0.463 - 0.185)  | <0.001    | -0.303 ( -0.474 - 0.132)  | <0.001    |
| WHO grade | -0.065 ( -0.096 - 0.033) | <0.001    | -0.216 ( -0.305 - -0.127) | <0.001    | -0.268 ( -0.388 - 0.149) | <0.001    | -0.148 ( -0.211 - 0.086) | <0.001    | -0.295 ( -0.415 - 0.175)  | <0.001    | -0.279 ( -0.458 - 0.100)  | 0.004     |

D: dual 18F-FDG and 68Ga-DOTANOC PET-CT semiquantitative grade; F: single 18F-FDG PET-CT semiquantitative grade; S: single 68Ga-DOTANOC PET-CT semiquantitative grade;

**Supplementary Table S4. C-index (95% CI) of Nomogram from Subgroup Analysis by Primary Site**

| Original               | Train            |                  | internal test    |                  |
|------------------------|------------------|------------------|------------------|------------------|
|                        | OS               | PFS              | OS               | PFS              |
| <b>Stomach</b>         | 0.78 (0.60-0.96) | 1.00             | 0.79 (0.70-0.89) | 0.84 (0.60-1.00) |
| <b>Small intestine</b> | 0.87 (0.78-0.96) | 0.82 (0.72-0.92) | 0.77 (0.66-0.87) | 1.00             |
| <b>Colorectum</b>      | 0.82 (0.73-0.92) | 0.85 (0.81-0.90) | 0.72 (0.65-0.79) | 0.85 (0.75-0.95) |

**Supplementary Table S5. C-index (95% CI) of Nomogram from Subgroup Analysis by Treatment**

| Treatment              | Train            |                  | internal test    |                  |
|------------------------|------------------|------------------|------------------|------------------|
|                        | OS               | PFS              | OS               | PFS              |
| <b>Surgery</b>         | 0.83 (0.75-0.91) | 0.70 (0.63-0.77) | 0.88 (0.80-0.97) | 0.79 (0.73-0.86) |
| <b>Without Surgery</b> | 0.79 (0.70-0.88) | 0.76 (0.70-0.69) | 0.82 (0.70-0.94) | 0.84 (0.77-0.91) |

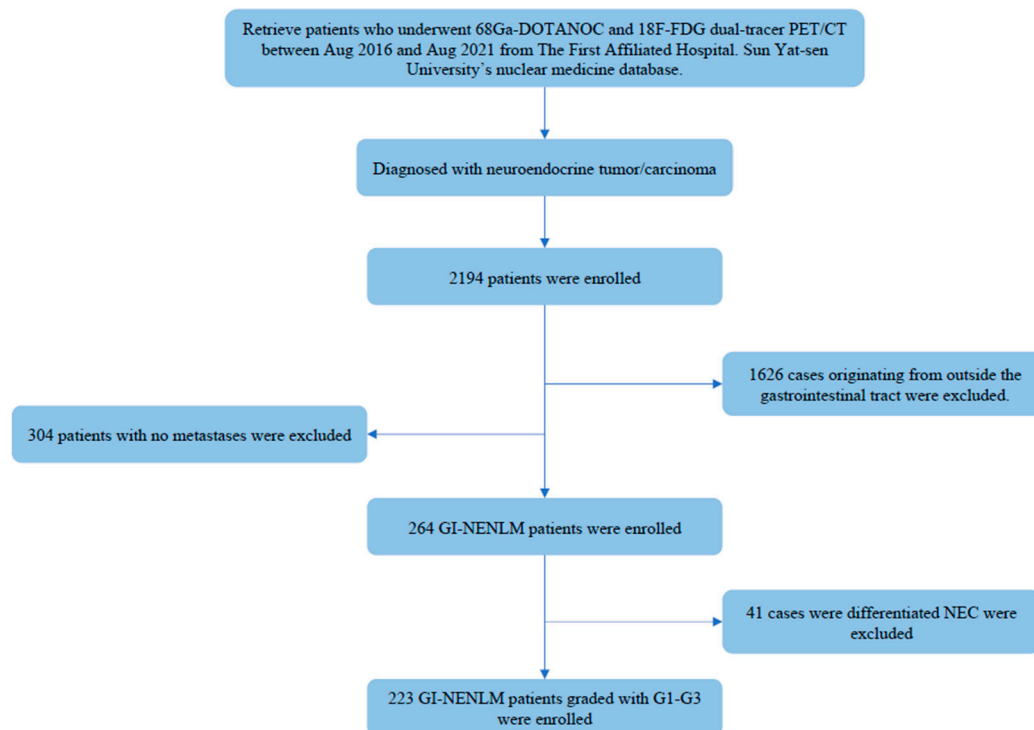

**Figure S1.** Patient Selection Flowchart.

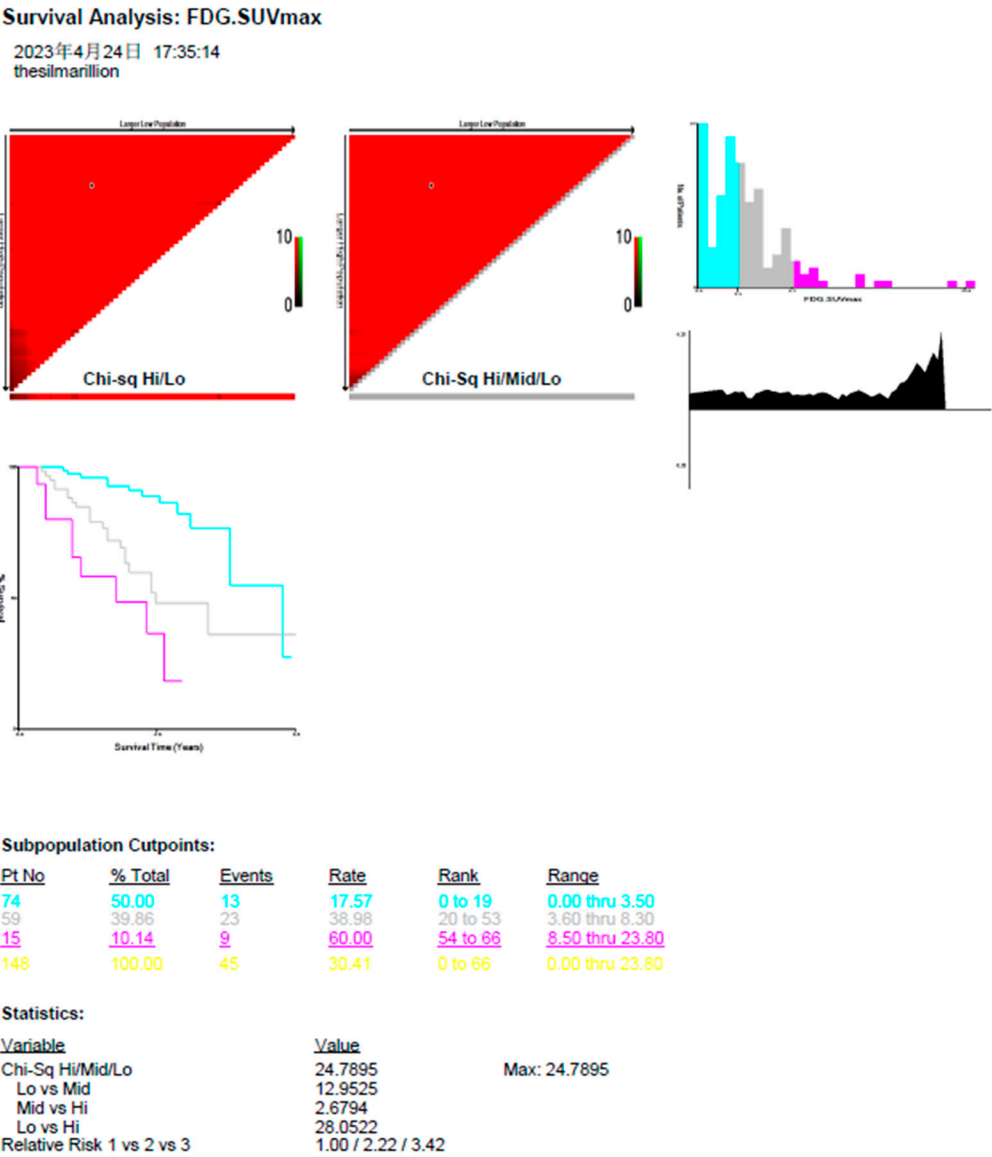

Copyright: Camp/Rimm, Yale University  
[www.tissuearray.org](http://www.tissuearray.org)

**Figure S2.** The process of X-tile software for stratification of 18F FDG SUVmax values.

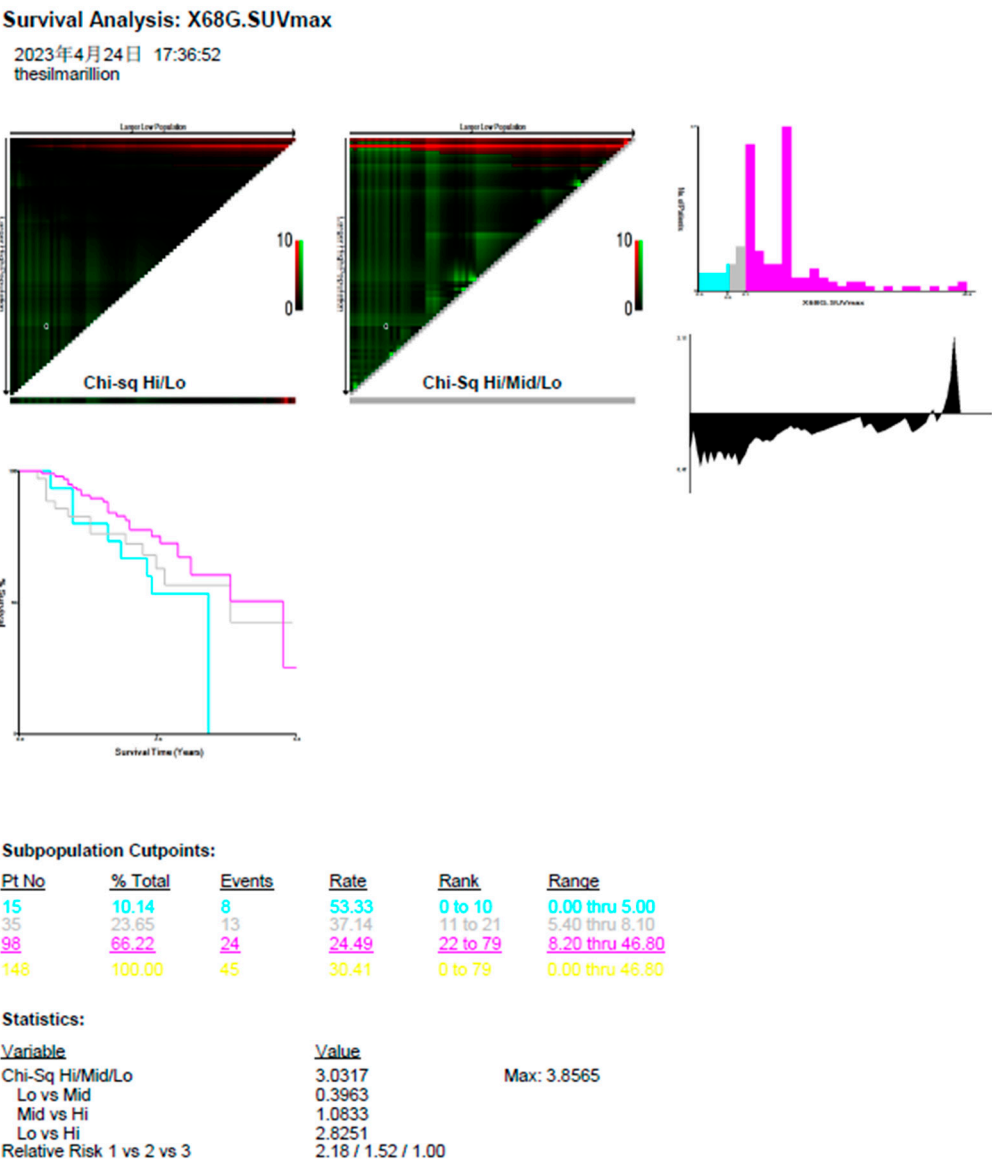



### Survival Analysis: NETPETscore

2023年4月24日 17:42:02  
thesilmarillion

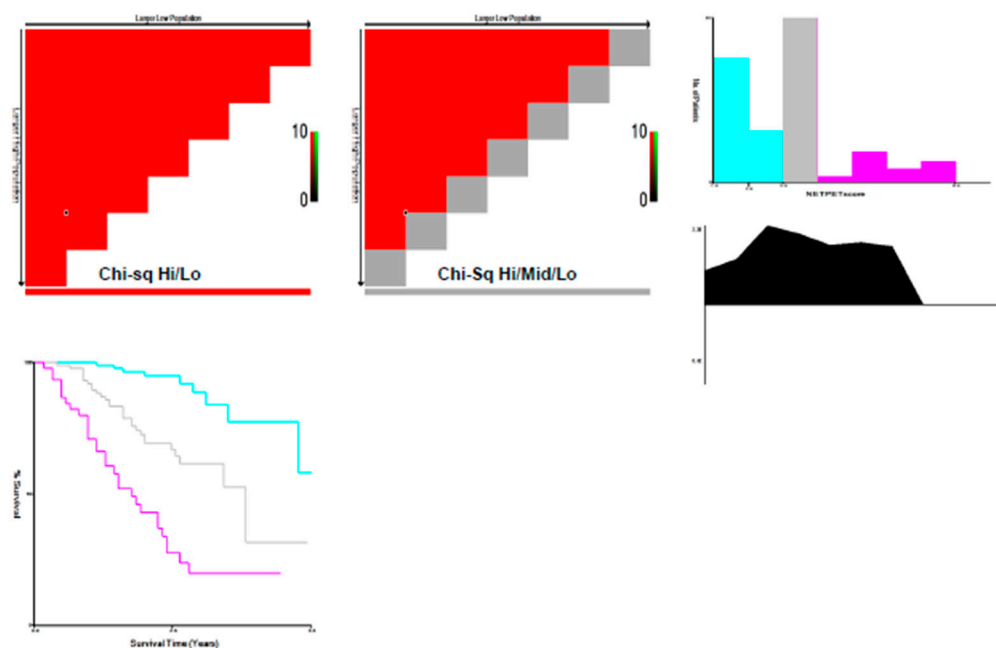

**Subpopulation Cutpoints:**

| <u>Pt No</u> | <u>% Total</u> | <u>Events</u> | <u>Rate</u> | <u>Rank</u> | <u>Range</u>   |
|--------------|----------------|---------------|-------------|-------------|----------------|
| 92           | 41.26          | 9             | 9.78        | 0 to 1      | 1.00 thru 2.00 |
| 86           | 38.57          | 29            | 33.72       | 2 to 2      | 3.00 thru 3.00 |
| 45           | 20.18          | 30            | 66.67       | 3 to 7      | 4.00 thru 8.00 |
| 223          | 100.00         | 68            | 30.49       | 0 to 7      | 1.00 thru 8.00 |

### Statistics:

| Variable                  | Value              |              |
|---------------------------|--------------------|--------------|
| Chi-Sq Hi/Mid/Lo          | 66.8310            | Max: 66.8310 |
| Lo vs Mid                 | 18.8911            |              |
| Mid vs Hi                 | 17.3412            |              |
| Lo vs Hi                  | 68.5812            |              |
| Relative Risk 1 vs 2 vs 3 | 1.00 / 3.45 / 6.81 |              |

Copyright: Camp/Rimm, Yale University  
www.tissuearray.org

**Figure S4.** The process of X-tile software for stratification of NETPET score.

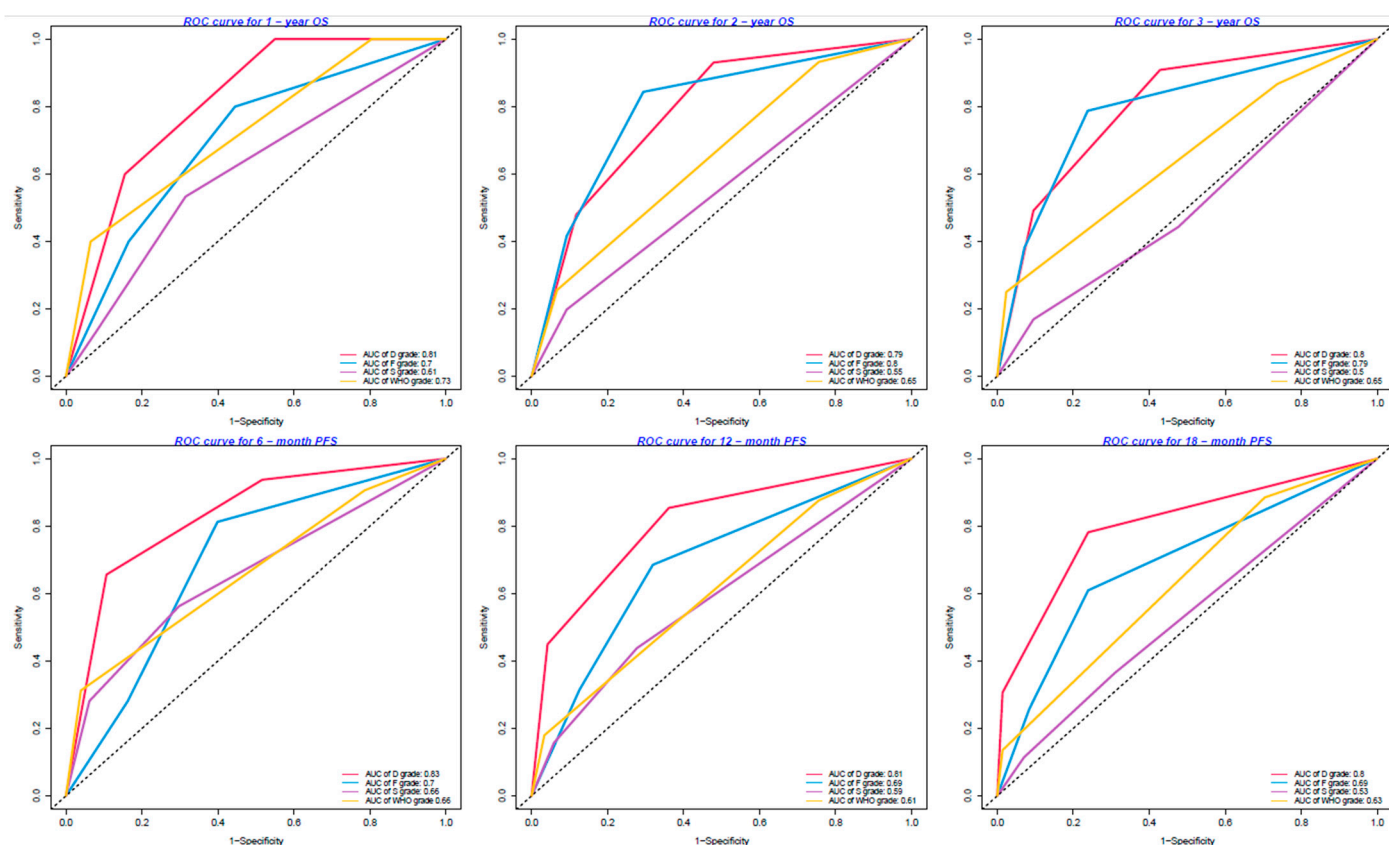

**Figure S5.** ROC curves for dual 18F-FDG and 68Ga DOTANOC PETCT visual grade (D grade) and examples of D grade, semiquantitative 18F-FDG PETCT grade (F grade), and semiquantitative 68Ga-DOTANOC PETCT grade (S grade) predicting 1-, 2-, 3-year OS and 6-, 12-, 18-month PFS in the overall cohort.

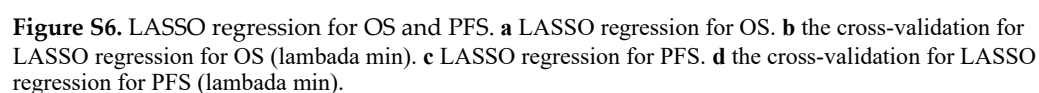

2023年4月25日 22:56:12  
thesilmarillion

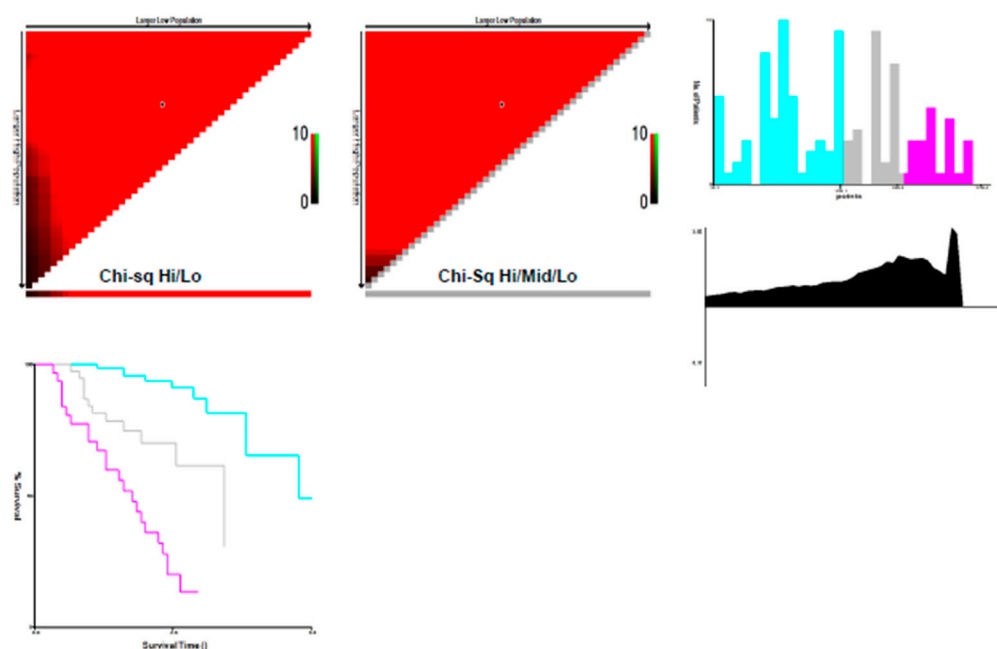

| <u>Pt No</u> | <u>% Total</u> | <u>Events</u> | <u>Rate</u> | <u>Rank</u> | <u>Range</u>       |
|--------------|----------------|---------------|-------------|-------------|--------------------|
| 79           | 53.38          | 10            | 12.66       | 0 to 22     | 14.69 thru 135.14  |
| 38           | 25.68          | 12            | 31.58       | 23 to 33    | 137.95 thru 189.52 |
| 31           | 20.95          | 23            | 74.19       | 34 to 46    | 195.85 thru 270.40 |
| 148          | 100.00         | 45            | 30.41       | 0 to 46     | 14.69 thru 270.40  |

| Variable                  | Value              |              |
|---------------------------|--------------------|--------------|
| Chi-Sq Hi/Mid/Lo          | 63.1852            | Max: 68.3318 |
| Lo vs Mid                 | 14.5734            |              |
| Mid vs Hi                 | 9.6845             |              |
| Lo vs Hi                  | 66.7341            |              |
| Relative Risk 1 vs 2 vs 3 | 1.00 / 2.49 / 5.86 |              |

**Figure S7.** The process of X-tile software for stratification of nomogram output scores for OS.

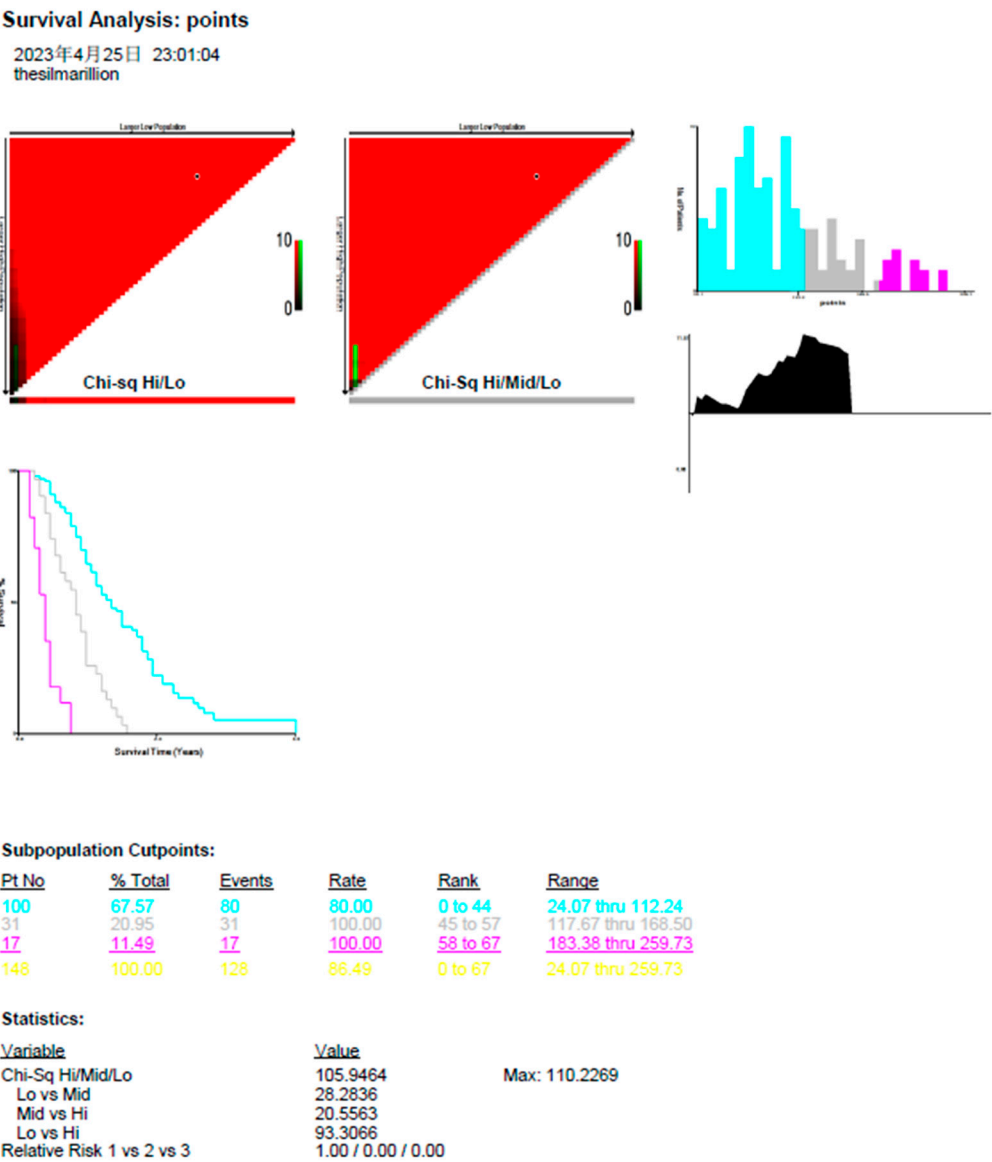

Copyright: Camp/Rimm, Yale University  
[www.tissuearray.org](http://www.tissuearray.org)

Figure S8. The process of X-tile software for stratification of nomogram output scores for PFS.

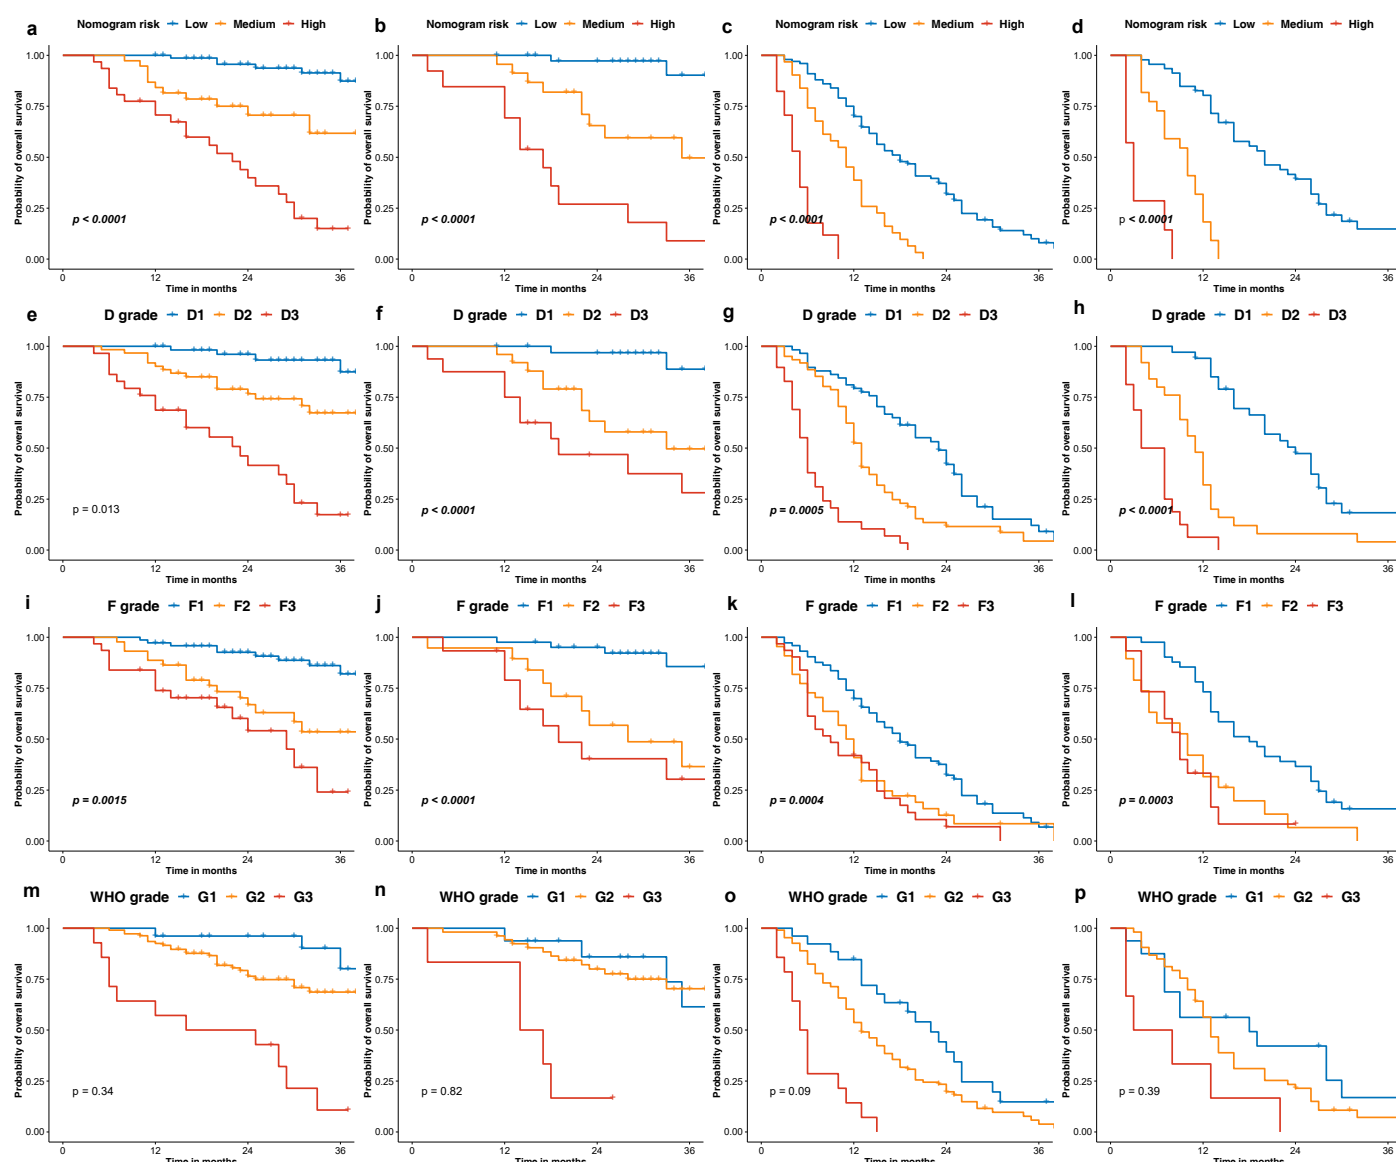

**Figure S9.** (a-b) The Kaplan Meier curves for risk Stratification Scale of the nomogram for OS in the training and internal validation cohort. (c-d) the Kaplan Meier curves for risk Stratification Scale of the nomogram for PFS in the training and internal validation cohort. (e-f) the Kaplan Meier curves for dual-scan visual grading for OS in the training and internal validation cohort. (g-h) the Kaplan Meier curves for dual-scan visual grading for PFS in the training and internal validation cohort. (i-j) the Kaplan Meier curves for semiquantitative 18F-FDG PETCT grading system for OS in the training and internal validation cohort. (k-l) the Kaplan Meier curves for semiquantitative 18F-FDG PETCT grading system for PFS in the training and internal validation cohort. (m-n) the Kaplan Meier curves for the WHO grading system for OS in the training and internal validation cohort. (o-p) the Kaplan Meier curves for the WHO grading system for PFS in the training and internal validation cohort.

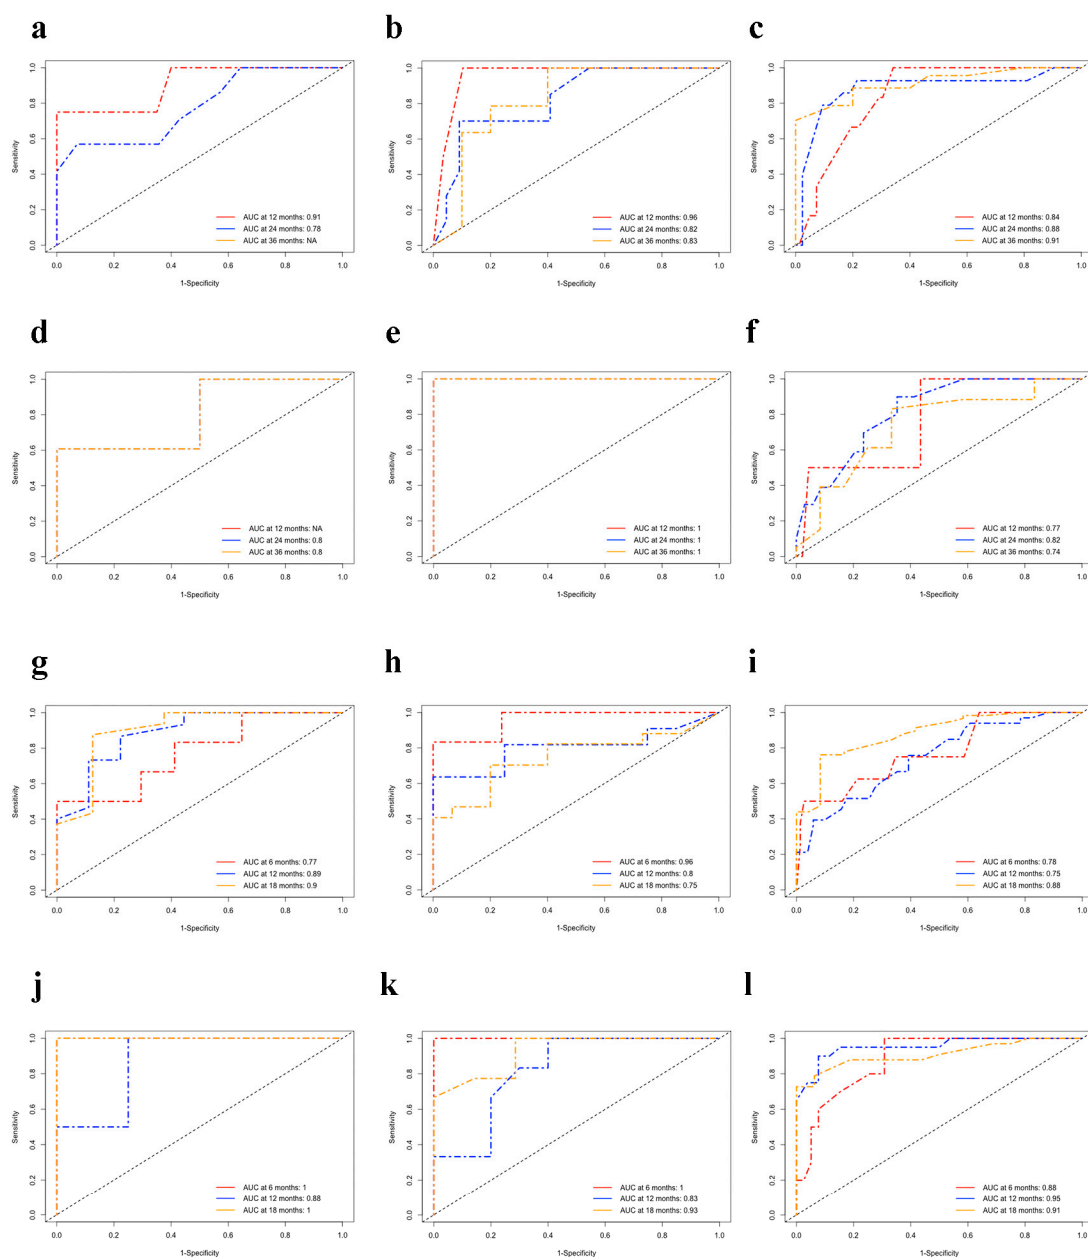

**Figure S10.** (a-l). Time ROC curve for OS. a The subgroup of stomach in Modelling cohort; b The subgroup of small intestine in Modelling cohort; c The subgroup of colorectum in Modelling cohort; d The subgroup of stomach in internal test cohort; e The subgroup of small intestine in internal test cohort; f The subgroup of colorectum in internal test cohort. Time ROC curve for PFS; g the subgroup of stomach in Modelling cohort; h The subgroup of small intestine in Modelling cohort; i The subgroup of colorectum in Modelling cohort; j The subgroup of stomach in internal test cohort; k The subgroup of small intestine in internal test cohort; l The subgroup of colorectum in internal test cohort.

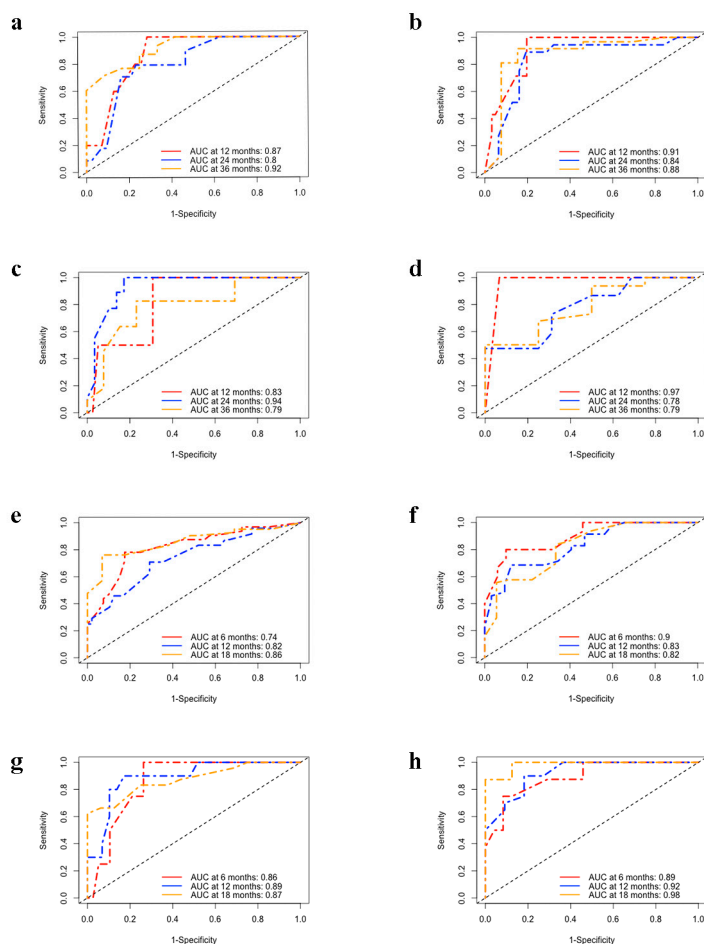

**Figure S11.** Time ROC curve for OS. a The subgroup of post-surgery in Modeling cohort; b The subgroup of no-surgery in Modeling cohort; c The subgroup of post-surgery in internal test cohort; d The subgroup of no-surgery in internal test cohort. Time ROC curve for PFS. e The subgroup of post-surgery in Modeling cohort; f The subgroup of no-surgery in Modeling cohort; g The subgroup of post-surgery in internal test cohort; h The subgroup of no-surgery in internal test cohort.
